# Supplementary material for: HRS–WASH axis governs actin-mediated endosomal recycling and cell invasion
Source: PubMed Central journal article supplement (PMC6028553; doi:10.1083/jcb.201710051), 2018-07-02
Supplement: JCB_201710051_sm.pdf [file JCB_201710051_sm.pdf]

Supplemental material

MacDonald et al., <https://doi.org/10.1083/jcb.201710051>

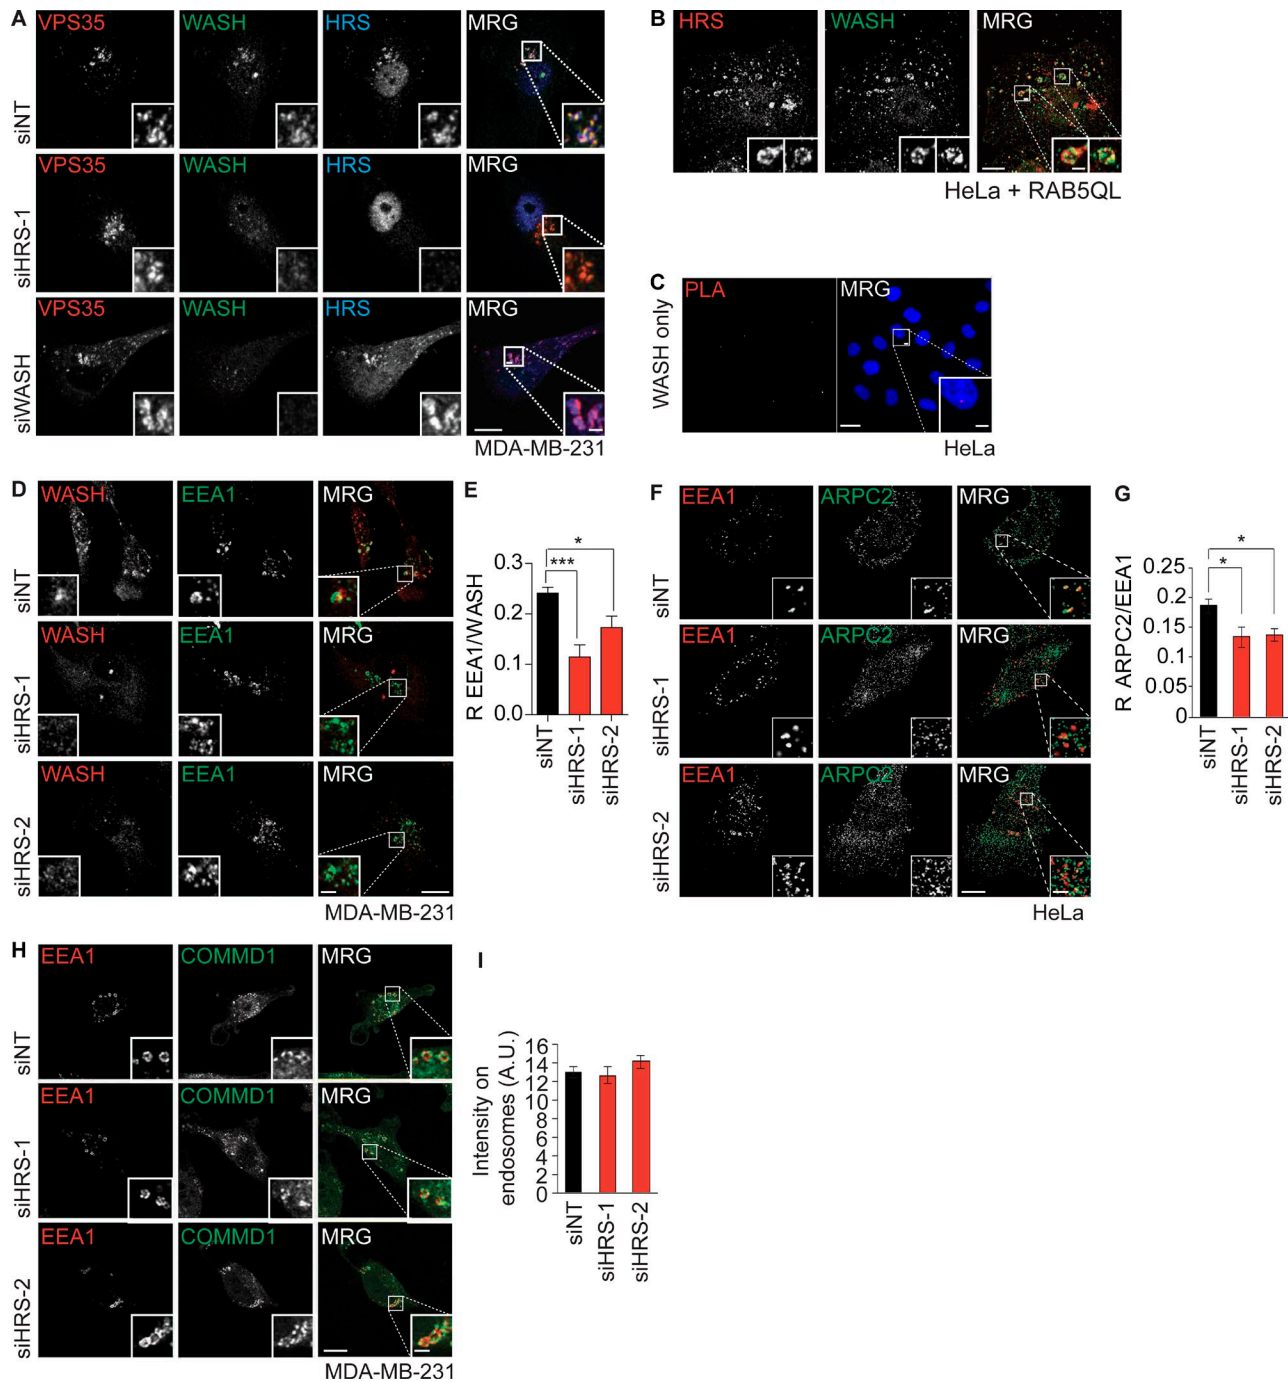

Figure S1. **HRS is required for the endosomal recruitment of WASH.** (A) MDA-MB-231 cells were treated with the indicated siRNA for 120 h before fixation in 4% PFA/PBS and labeling with antibodies. (B) HeLa cells were transfected with Flag-Rab5QL for 24 h before fixation in 4% PFA and labeling with the indicated antibodies. (C) PLA identifying protein-protein interactions between 10–40 nm. Technical control, WASH-only antibody. Maximum-projection image. (D) MDA-MB-231 cells were treated with the indicated siRNA for 120 h before fixation in 4% PFA/PBS and labeling with antibodies. (E) Pearson's R correlation value for WASH and EEA1 (~10 images per condition; >150 cells total). (F) HeLa cells were treated with the indicated siRNA for 120 h before fixation in 4% PFA/PBS and labeling with antibodies. (G) Pearson's R value for EEA1 and ARPC2 (30 cells total). (H) MDA-MB-231 cells were treated with the indicated siRNA for 120 h before fixation in 4% PFA/PBS and labeling with antibodies. MRG, merge. (I) Sum intensity value for COMMD1 on EEA1 endosomes (A.U.; ~10 images per condition; 30 cells total). *n* = 3; error bars indicate SEM. \*, *P* < 0.05; \*\*\*, *P* < 0.001. Statistical analysis, one-way ANOVA for all comparisons with Dunnett's post hoc test. Bars: (main images) 10 μm; (insets) 2 μm. Images show a single slice, except C.

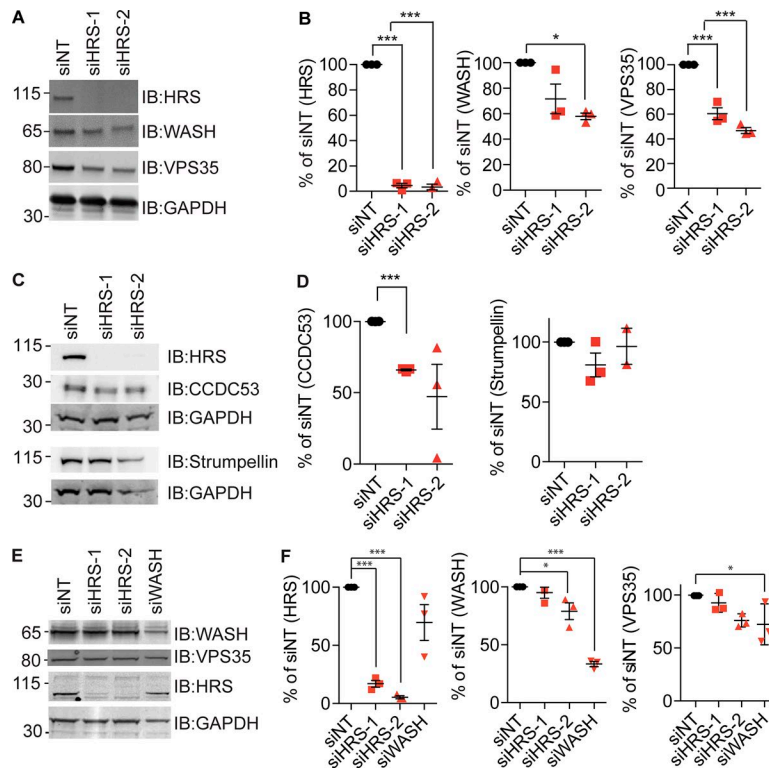

Figure S2. **HRS is required for the endosomal recruitment of WASH.** (A–F) HeLa cells (A–D) and MDA–MB–231 cells (E and F) were treated with siRNA for 120 h before lysis in RIPA buffer.  $n = 3$ . \*,  $P < 0.05$ ; \*\*\*,  $P < 0.001$ . One-way ANOVA with Dunnett’s post hoc test. Western blot band intensities were quantified from Odyssey scans. IB, immunoblot. Molecular masses are given in kilodaltons.

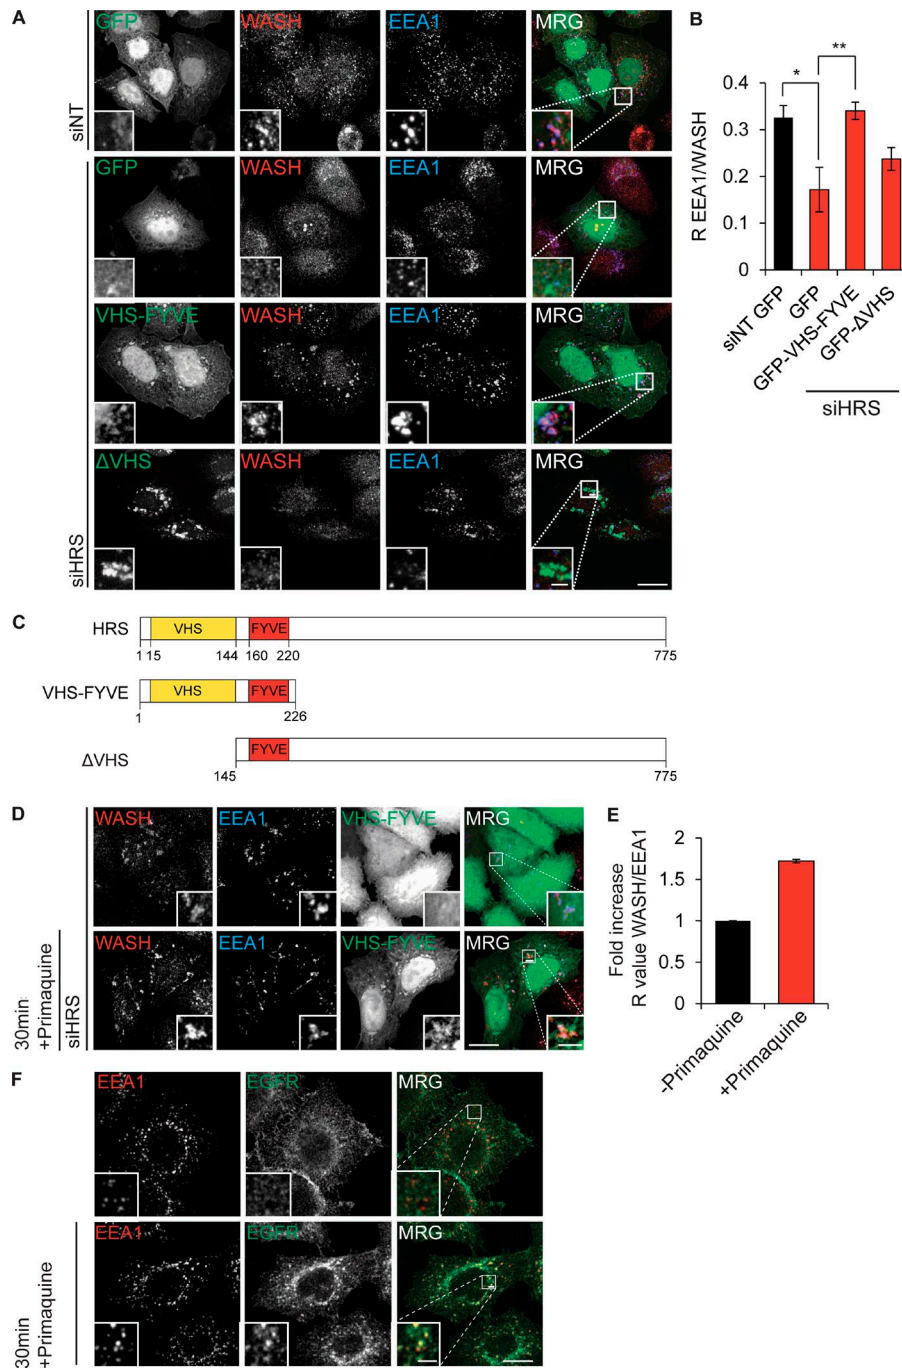

Figure S3. **VHS-FYVE domains are sufficient to recruit WASH to the endomembrane.** (A and C) HeLa cells were treated with siRNA targeting HRS for 120 h before transfection with GFP or GFP-VHS-FYVE (mHRS 1–226) domain for 24 h before fixation and antibody labeling for EEA1 and WASH. (B) Quantification of Pearson's R correlation value (>25 cells over two independent experiments). \*,  $P < 0.05$ ; \*\*,  $P < 0.01$ . One-way ANOVA with Dunnett's post hoc test. Maximum-projection images. (D) HeLa cells treated as in A were pretreated with 100  $\mu\text{M}$  primaquine for 30 min before fixation and labeling with the indicated antibodies. (E) Pearson's R correlation values divided by the siNT control (~50 cells per condition; 150 cells total). Sum intensity images.  $n = 3$ ; error bars indicate SEM. (F) HeLa cells treated with 100  $\mu\text{M}$  primaquine for 30 min before fixation and labeling with the indicated antibodies. Sum intensity images. Bars: (main images) 10  $\mu\text{m}$ ; (insets) 2  $\mu\text{m}$ . MRG, merge.

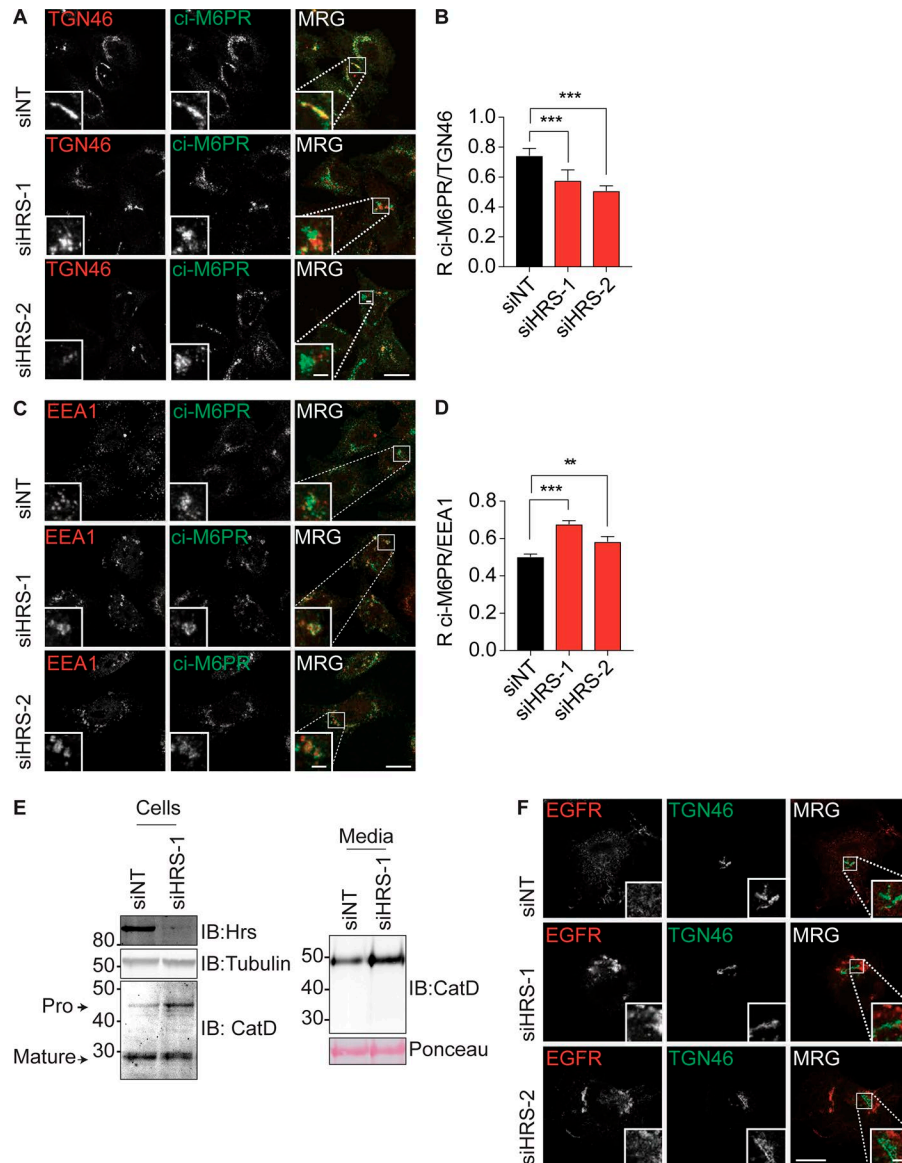

**Figure S4. HRS is required for receptor recycling. (A–D)** HeLa cells were treated with siRNA for 120 h before fixation in 4% PFA/PBS and labeling with the indicated antibodies. (Quantification of >80 cells per condition for a representative experiment; Pearson R values calculated using ImageJ; three independent experiments). Error bars indicate SEM. **(E)** TCA precipitation from the media and lysis in NP-40 buffer (representative experiment). CatD, cathepsin D; IB, immunoblot. Molecular masses are given in kilodaltons. **(F)** HeLa cells were treated with siRNA for 120 h before fixation in 4% PFA/PBS and labeling with the indicated antibodies. Bars: (main images) 10  $\mu$ m; (insets) 2  $\mu$ m. All images taken from a single slice. \*\*,  $P < 0.01$ ; \*\*\*,  $P < 0.001$ . Statistical analysis, one-way ANOVA for all comparisons with Dunnett's post hoc test. MRG, merge.

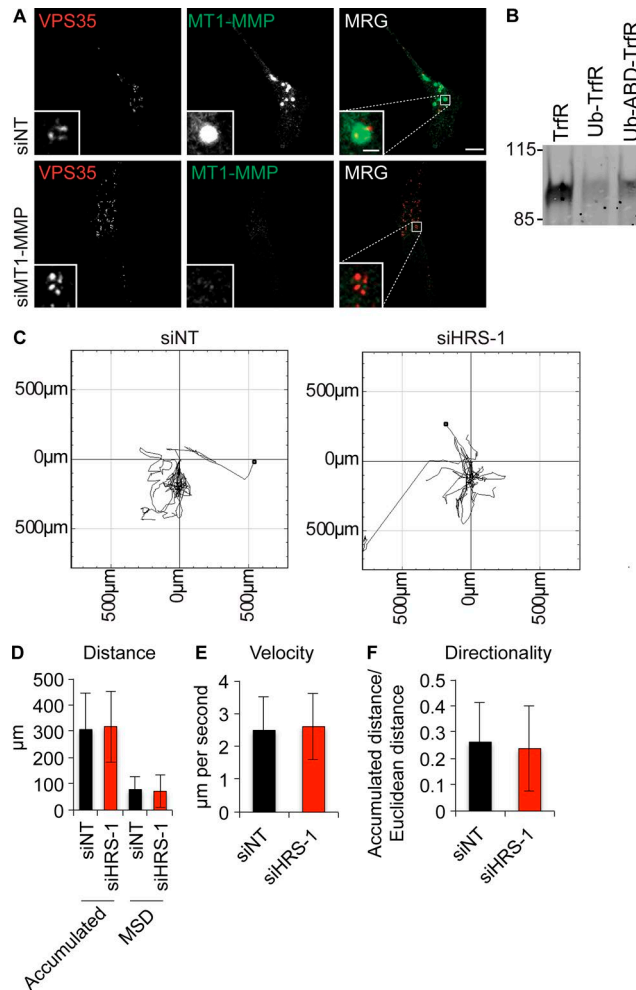

Figure S5. **HRS does not affect cell migration over a 2D substrate.** (A) MDA-MB-231 cells were treated twice with siRNA over 120 h before fixation and subsequent treatment with guanidinium hydrochloride. Images taken from a single slice. Bars: (main images) 10  $\mu\text{m}$ ; (insets) 2  $\mu\text{m}$ . MRG, merge. (B) Western blot of indicated TrfR chimeras transfected into HeLa cells for 24 h and immunoprecipitated with myc tag to resolve bands on 8% SDS-PAGE gel. (C-F) Cells were sparsely plated on a plastic substrate and imaged for 16 h. Individual cells were tracked using manual tracker ImageJ plugin, distance (accumulated [total distance covered]), mean squared displacement (distance from start position), and directionality (accumulated distance/mean squared displacement) were measured and extracted using chemotaxis ImageJ plugin ( $n = 3$  individual experiments; 20 cells per experiment). Error bars indicate SEM.

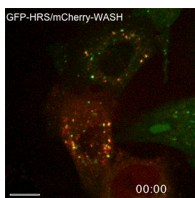

Video 1. **HeLa S3 Flp-In cells stably expressing GFP-mHRS transfected with mCherry-mWASH on a siWASH-treated background.** Bars, 10  $\mu\text{m}$ . 300 ms/frame.

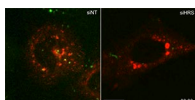

Video 2. **HeLa cells transfected with indicated siRNA (NT or HRS) for 120 h were transfected with EGFR-paGFP and mCherry-RAB4.** paGFP was activated in mCherry-positive endosomes using a pulse of 405-nm laser light. Bars, 10  $\mu\text{m}$ . 600 ms/frame.

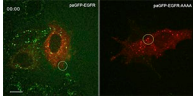

Video 3. **HeLa cells were transfected with EGFR-paGFP/EGFR-YLIP/AAAA-paGFP (actin-binding mutant) and mCherry-RAB4.** paGFP was activated in RAB4-positive endosomes using a pulse of 405-nm laser light. Bars, 10  $\mu$ m. 600 ms/frame.

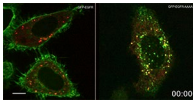

Video 4. **HeLa cells transfected with either EGFR-GFP or EGFR-YLIP/AAAA-GFP and mRFP-EEA1.** Bars, 10  $\mu$ m. 600 ms/frame.

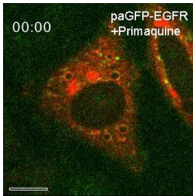

Video 5. **HeLa cells treated with indicated siRNA for 120 h were transfected with EGFR-paGFP and pCherry4-RAB4.** Cells were pretreated with 100 mM primaquine to inhibit recycling before paGFP was activated in mCherry-positive endosomes using a pulse of 405-nm laser light. Bars, 10  $\mu$ m. 600 ms/frame.

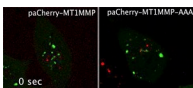

Video 6. **MDA-MB-231 cells were transfected with paCherry-MT1-MMP or paCherry-MT1-MMP-LLY/AAA (actin binding mutant) and GFP-EEA1.** paCherry was activated in EEA1-positive endosomes using a pulse of 405-nm laser light. Bars, 10  $\mu$ m. 6 s/frame.
